# Supplementary material for: Behavior-dependent cis regulation reveals genes and pathways associated with bower building in cichlid fishes
Source: PubMed Central journal article supplement — Proc Natl Acad Sci U S A. 2018 Nov 5;115(47):E11081–90. doi: 10.1073/pnas.1810140115 (PMC6255178; doi:10.1073/pnas.1810140115), 2018-11-05
Supplement: pnas.1810140115.sapp.pdf [file pnas.1810140115.sapp.pdf]

### Supplementary Table S1

Table outlines species names, bower behavior type, source for description of bower behavior, source of sample, and, if wild caught, source location at Lake Malawi.

| Species                                                            | Bower Behavior | Behavior source           | Sample source                        | Location                           |
|--------------------------------------------------------------------|----------------|---------------------------|--------------------------------------|------------------------------------|
| <i>Mchenga conophorus</i>                                          | Castle         | Lab Observation           | Lab bred                             | NA                                 |
| <i>Ctenopharynx nitidus</i>                                        | Castle         | Konings(1)                | Martin Genner [#17]                  | Metangula                          |
| <i>Copadichromis likomae</i>                                       | Castle         | Konings(1)                | Martin Genner [#52]                  | Metangula                          |
| <i>Copadichromis sp.</i><br>"mloto goldcrest" sensu<br>Konings     | Castle         | Konings(1)                | Lab bred                             | NA                                 |
| <i>Tramitichromis</i><br>"chembe"                                  | Castle         | Mckaye <i>et al.</i> (2)  | Ryan York                            | Eastern Thumbi;<br>Free Anchor Bay |
| <i>Taeniolethrinops</i><br><i>furcicauda</i>                       | Castle         | Konings(1)                | Martin Genner [#25]                  | Metangula                          |
| <i>Nyassachromis</i> "otter"                                       | Castle         | Konings(1)                | Ryan York                            | Otter Point                        |
| <i>Mylochromis</i><br><i>anaphyrmus</i>                            | Castle         | Konings(1)                | Martin Genner [#120]                 | Cape Maclear                       |
| <i>Otopharynx</i><br><i>argyrosoma</i>                             | Castle         | Konings(1)                | Martin Genner [#156]                 | L Malombe                          |
| <i>Trematocranus</i><br><i>placodon</i>                            | Pit            | Konings(1) Keenleyside(3) | Streelman<br>finclip<br>stock [2257] | Otter Point                        |
| <i>Tramitichromis</i><br><i>intermedius</i>                        | Pit            | Lab Observation           | Lab bred                             | NA                                 |
| <i>Copadichromis</i><br><i>virginalis</i> "yellow blaze<br>nkanda" | Pit            | Lab Observation           | Lab bred                             | NA                                 |

|                                     |     |                 |                                |                                          |
|-------------------------------------|-----|-----------------|--------------------------------|------------------------------------------|
| <i>Astatotilapia calliptera</i>     | Pit | Lab Observation | Lab bred                       | NA                                       |
| <i>Fossochromis rostratus</i>       | Pit | Konings(1)      | Streelman finclip stock [2549] | Otter Point                              |
| <i>Aulonocara baenschi</i>          | Pit | Konings(1)      | Lab Bred                       | NA                                       |
| <i>Dimidiochromis compressiceps</i> | Pit | Konings(1)      | Lab Bred                       | NA                                       |
| <i>Mylochromis sphaerodon</i>       | Pit | Konings(1)      | Lab Bred                       | NA                                       |
| <i>Nimbochromis polystigma</i>      | Pit | Konings(1)      | Ryan York                      | Eastern Thumbi; south of Free Anchor Bay |
| <i>Dimidiochromis kiwinge</i>       | Pit | Konings(1)      | Streelman finclip stock [2384] | Local Fishermen, Cape Maclear            |
| <i>Mylochromis lateristriga</i>     | Pit | Konings(1)      | Ryan York                      | Northwestern Thumbi                      |

**Dataset S1:** GeneAnalytics results for genes associated with high divergence variants between pit and castle

**Dataset S2:** Allele-specific expression results from MBASED

**Dataset S3:** Genes set enrichments resulting from the sign test

**Dataset S4:** Four population comparisons with significantly negative f4 statistics

**Movie S1:** *Mchenga conophoros* castle building behavior. The video features a male during breeding season scooping mouthfuls of sand and spitting them to construct his bower (scoops and spits are indicated by text in the video). Building behavior is alternated with aggressive encounters toward other males and courtship acts directed at females. Filmed at Cape Maclear, Malawi in July 2015.

## Supplementary Figures

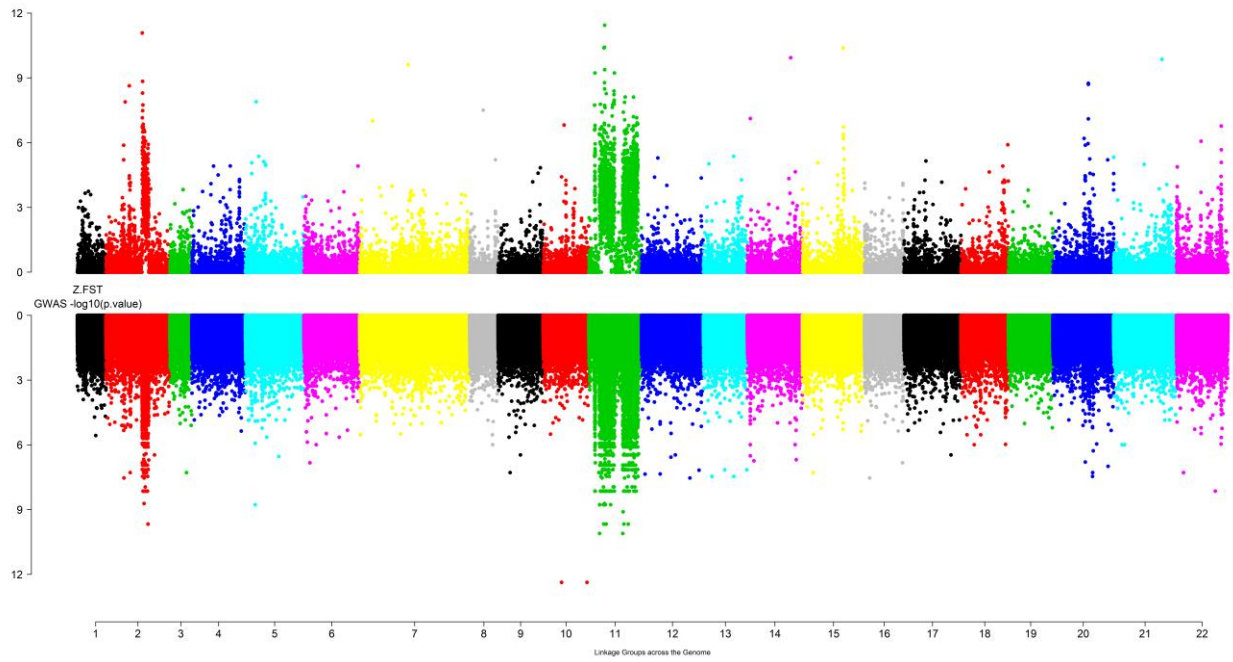

**Figure S1: Comparison of genetic divergence and association patterns across the genome.** Independent measures of pit versus castle divergence,  $F_{ST}$  [z-transformed  $F_{ST}$ ] and ancestry-corrected GWAS [-log10 (p value)], across the genome show highly similar patterns.

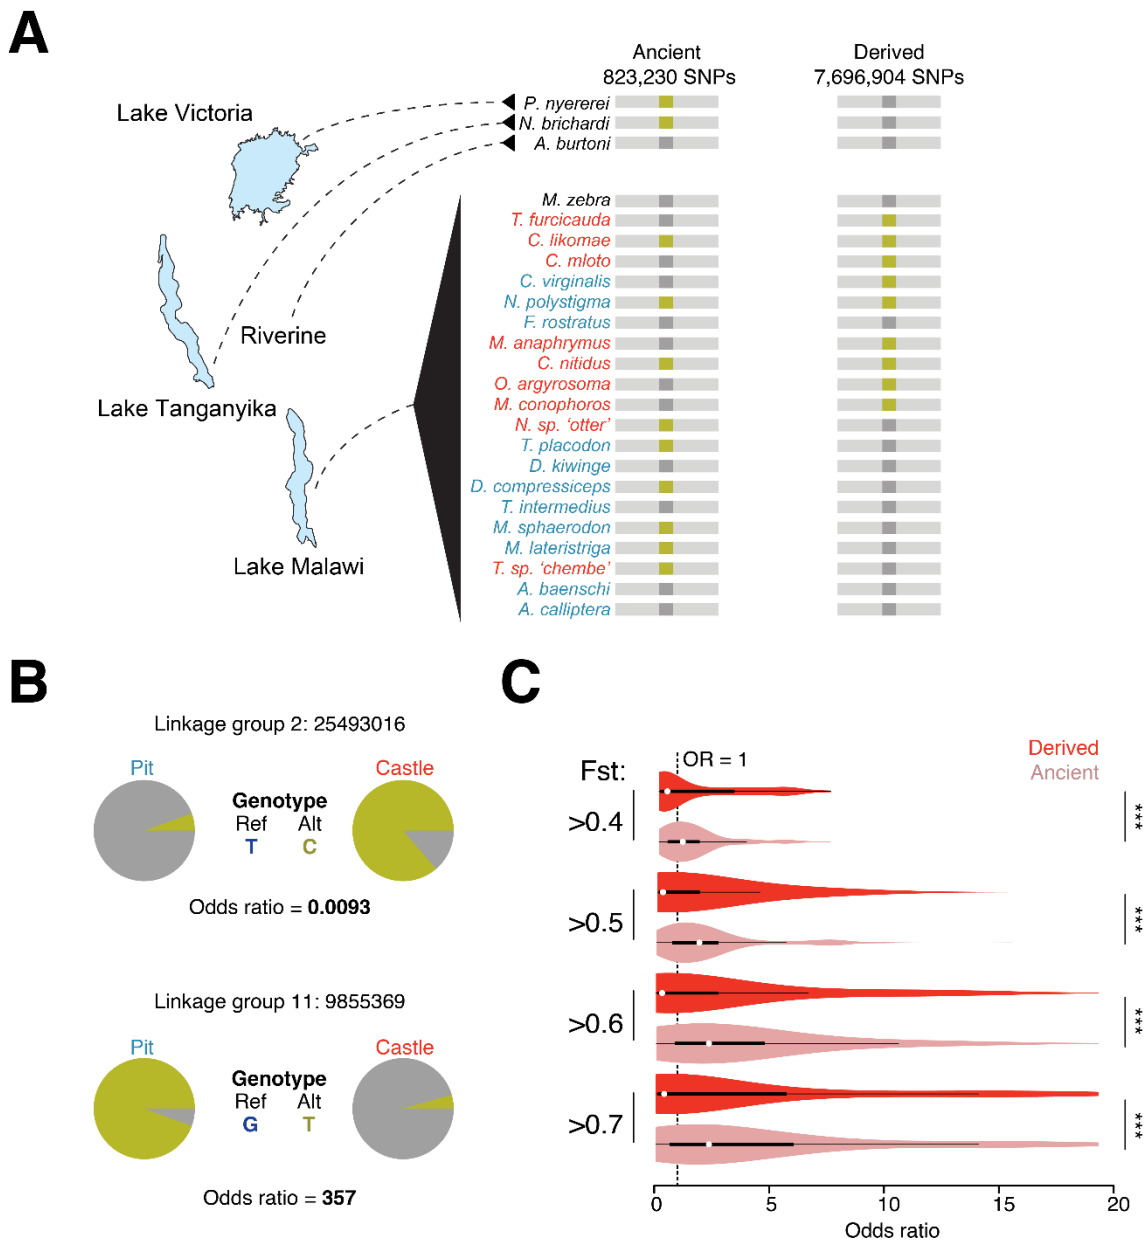

Figure S2 **Genome-wide ancestral and derived SNP enrichments** | (A) Cartoon describing the identification of derived and ancestral SNPs through whole-genome alignment with 4 non-sand dweller genomes (B) Representative high odds ratio and low odds ratio SNPs as identified by a GWAS on bower type. GWAS across the genome mirrors patterns of  $F_{ST}$  [Figure S1] (C) Violin plots of the GWAS odds ratio for SNPs at increasingly stringent  $p$ -value cutoffs, divided into derived (red) and ancestral (pink) groupings. \*\*\* = Kruskal-Wallis  $p < 0.0001$ .

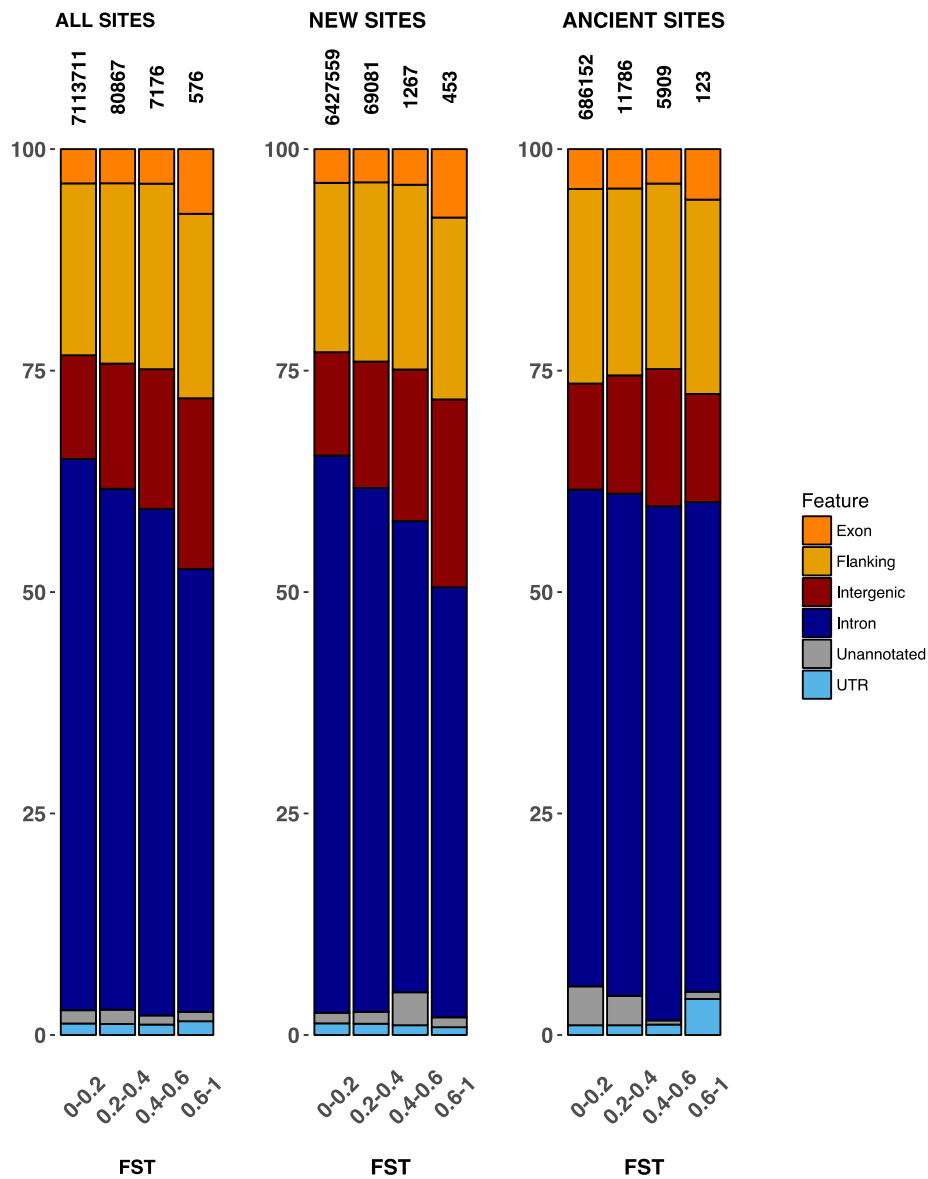

Figure S3 **Genomic distribution and FST of new and ancient SNPs** | Bars indicate proportion of genomic features represented by SNPs binned by FST values for new SNPs (polymorphic only within Lake Malawi), ancient SNPs (polymorphic within and outside of Lake Malawi), and all SNPs. 9 % of all SNPs are ancient, whereas 20% of high FST SNPs are ancient (Chi-squared test, p-value < 2.2e-16)

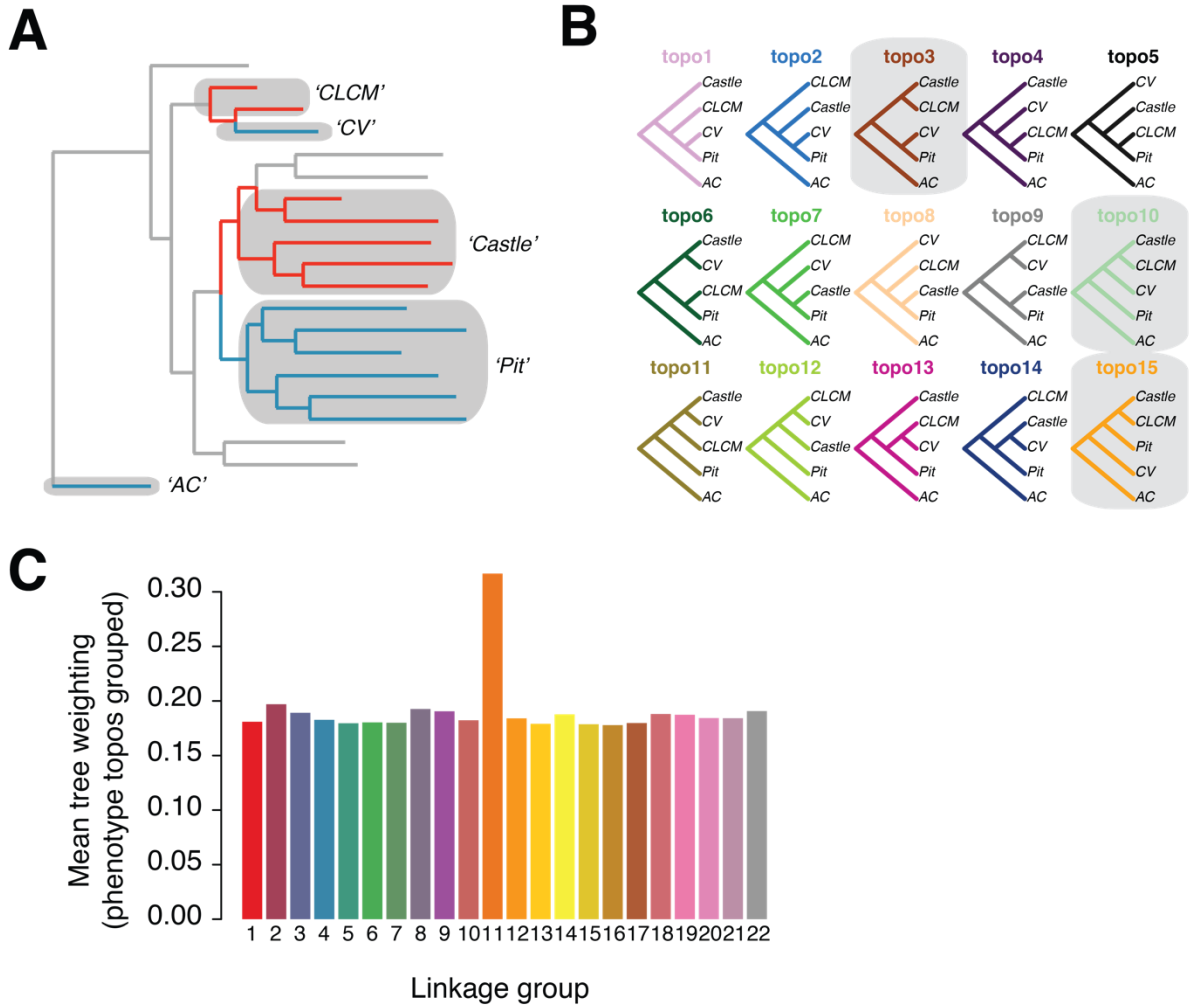

Figure S4 **Topology weighting with Twisst** | **(A)** Phylogeny of the clades used in the Twisst analyses. Branches are colored red and blue for pit and castle species, respectively. **(B)** The 15 topologies (“topos”) weighted by Twisst with the phylogenies that group by bower phenotype highlighted with grey backgrounds. **(D)** Barplot of mean combined tree weightings for the three ‘phenotype’ topos (topo3, topo10, topo15) as binned by linkage group.

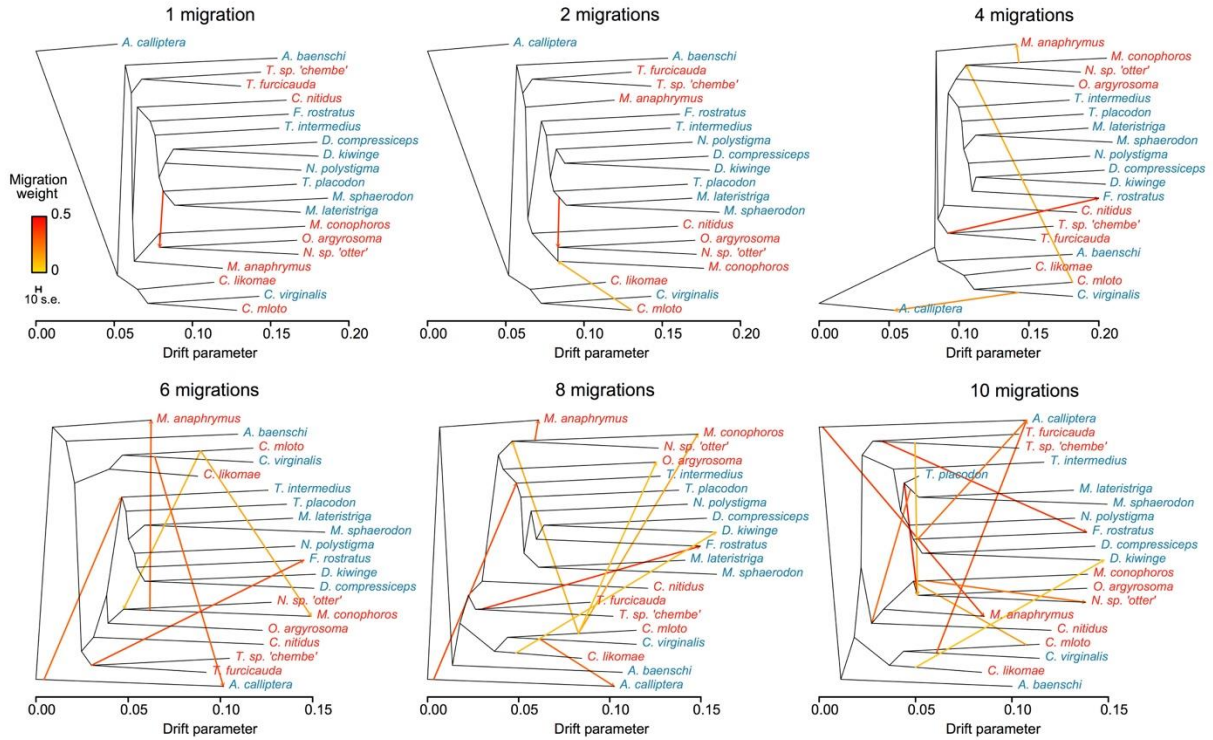

Figure S5 TREEMIX scenarios | Phylogenies are plotted with migration edges for 1, 2, 4, 6, 8, and 10 migrations. All plotted migration edges are significant. Pit and castle species names are colored blue and red, respectively.

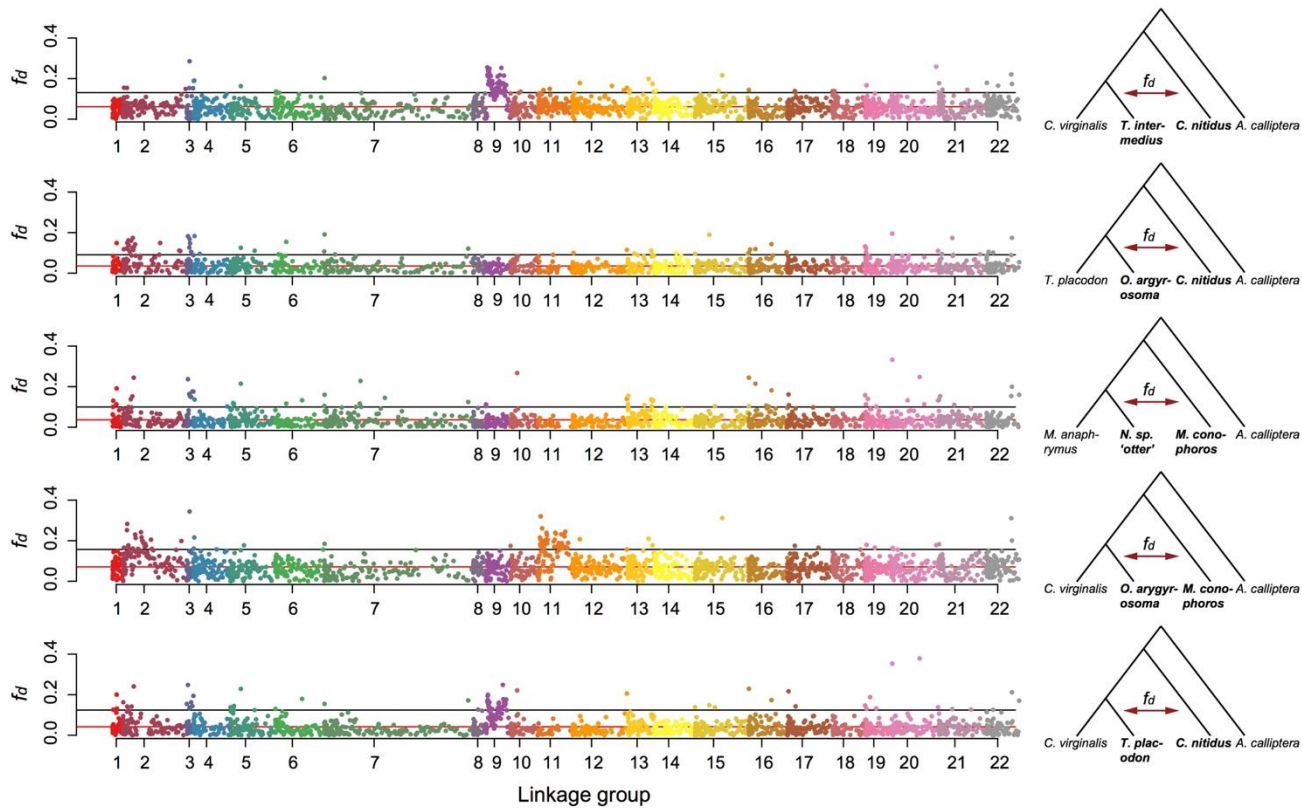

Figure S6 **Genome-wide  $f_d$  distribution** | Genome-wide scatterplots of  $f_d$  for the five most significant comparisons from the  $f_d$  analyses (cartoon comparisons presented next to the scatterplots). Higher  $f_d$  values indicate greater support for introgression at that locus.



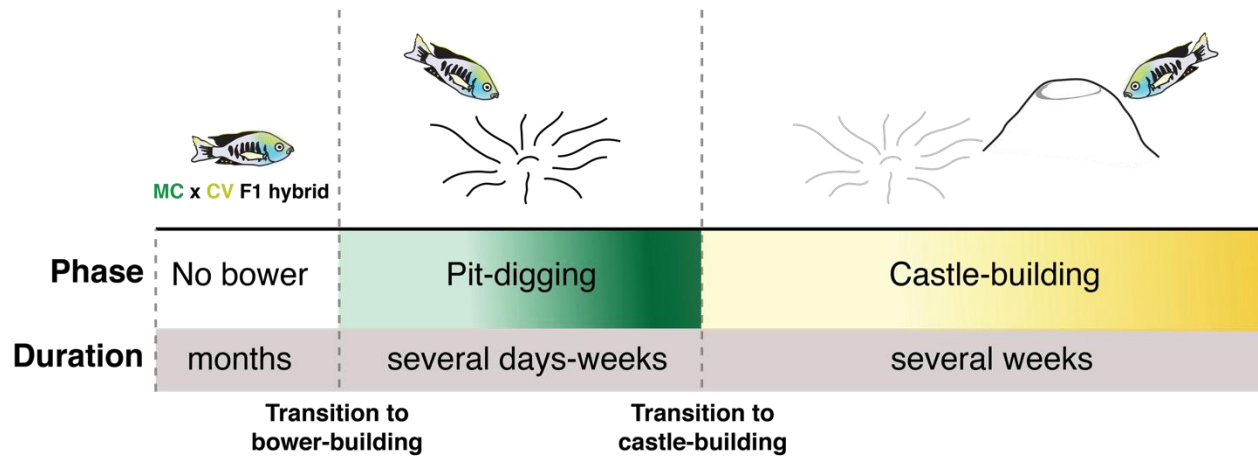

Figure S7 **Ontogeny of *Copadichromis virginalis* x *Mchenga conophoros* F<sub>1</sub> hybrid bower building** | The cartoon indicates the typical progression of bower building stages during a courtship “season”, proceeding from the initiation of pit-digging to the transition to castle-building.

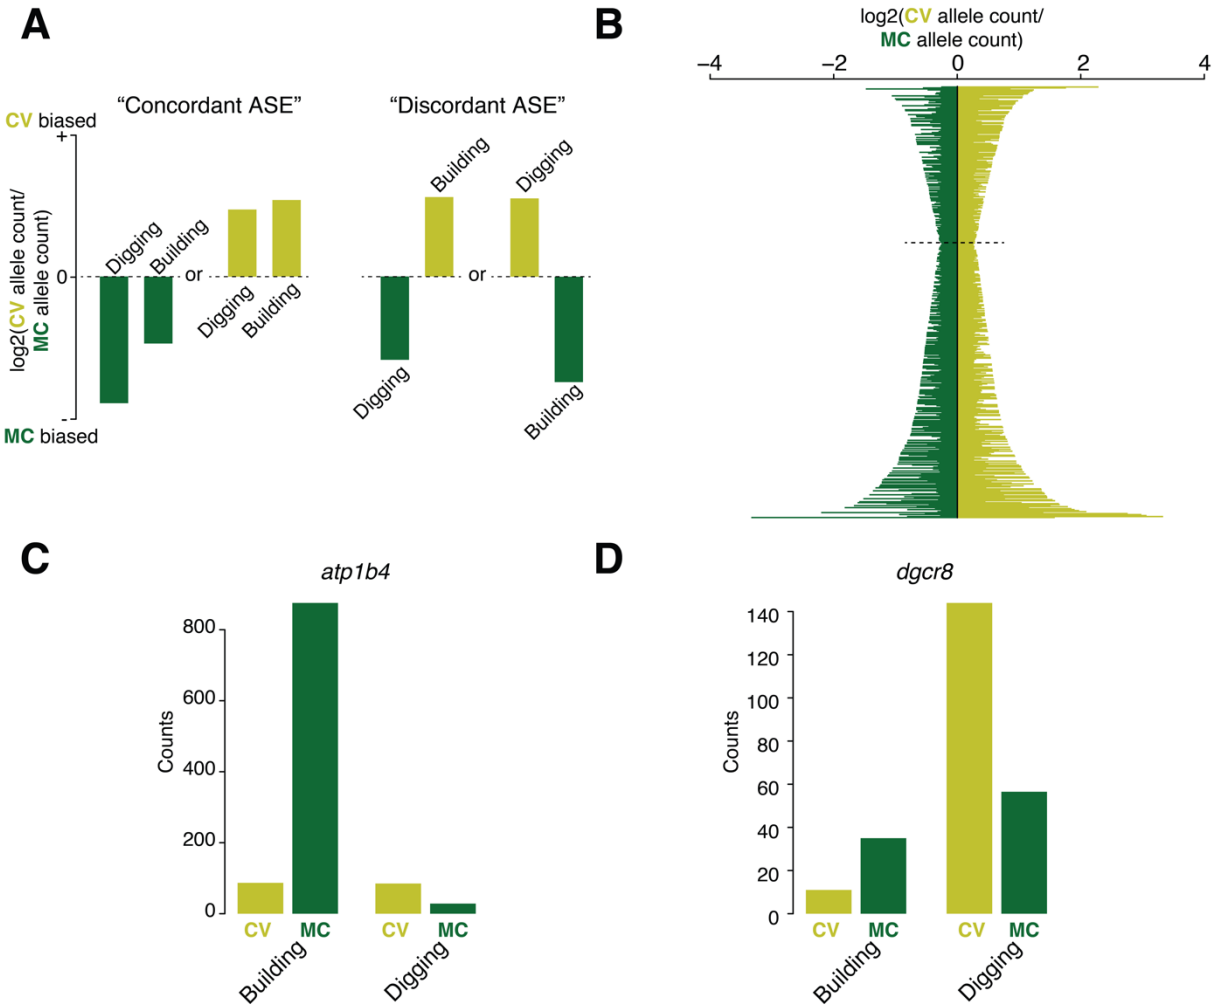

**Figure S8 Genes with discordant and concordant allele-specific expression (ASE) across behavioral states | (A)** Cartoon examples of the log<sub>2</sub> ASE ratio between *C. virginalis* (“CV”; pit) and *M. conophoros* (“MC”; castle) alleles for genes showing concordant ASE (same direction in allelic bias between behaviors) and discordant ASE (different direction in allelic bias). **(B)** Barplot of 436 genes identified as displaying discordant ASE. Each row represents an individual gene and contains two bars, one for the log<sub>2</sub> ASE ratio during the building phase and the other representing this ratio during the digging phase. Rows above the dashed line indicate genes that are biased toward CV during the building phase and toward MC during the digging phase. Rows below the dashed line indicate the opposite, namely an MC bias during the building phase and CV bias during the digging phase. The data presented here correspond to Dataset S3. **(C)** Barplot of gene-level RNA-seq expression counts for CV and MC alleles across digging and building behaviors for the gene *atp1b4*. **(D)** Barplot of gene-level RNA-seq expression counts for CV and MC alleles across digging and building behaviors for the gene *dgcr8*.

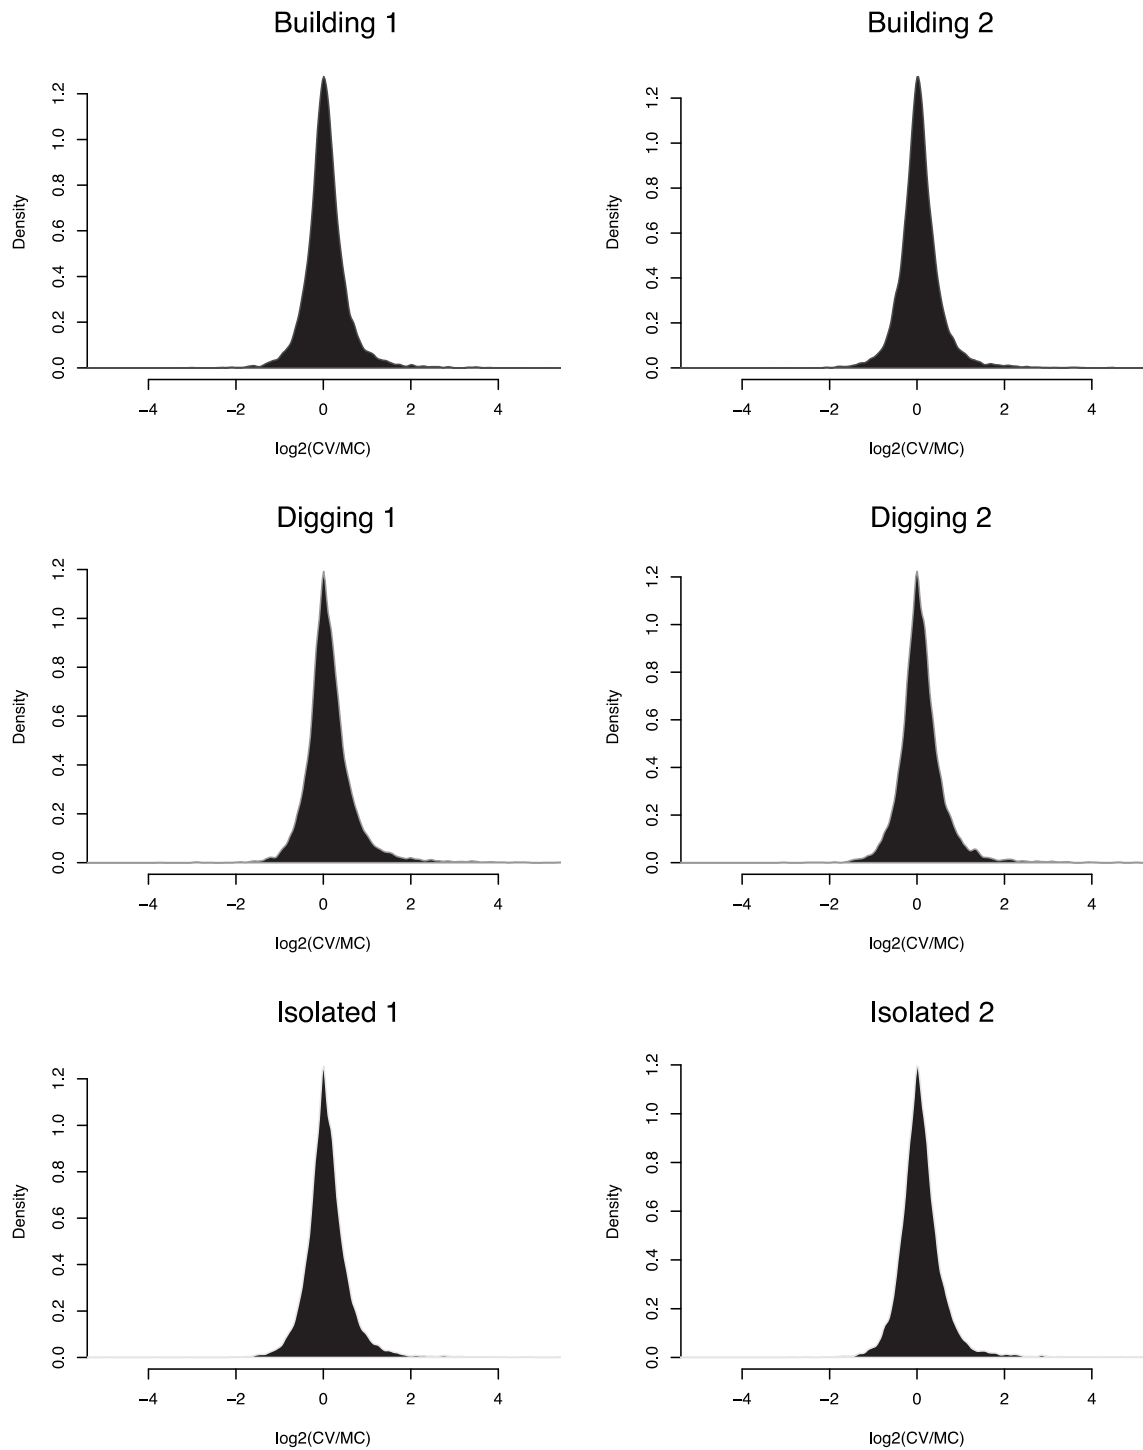

Figure S9 **The distribution of allele specific expression across  $F_1$  hybrid samples and contexts** | Density plots representing the distribution of  $\log_2(\text{CV allele counts}/\text{MC allele counts})$  for all genes measured after thresholding (see methods) in each sequencing sample.

**References:**

1. Konings A (2007) *Malawi Cichlids In Their Natural Habitat. 4th Edition* (Cichlid Press).
2. Mckaye KR, Howard JH, Stauffer JR, Morgan RP, & Shonhiwa F (1993) Sexual Selection and Genetic-Relationships of a Sibling Species Complex of Bower Building Cichlids in Lake Malawi, Africa. *Japanese Journal of Ichthyology* 40(1):15-21.
3. Keenleyside MHA (1991) *Cichlid Fishes: Behavior, Ecology and Evolution* (Chapman and Hall) 1st Ed.
